# Supplementary material for: Predicting the Efficacy and Safety of TACTICs (Tumor Angiogenesis-Specific CAR-T Cells Impacting Cancers) Therapy for Soft Tissue Sarcoma Patients
Source: PubMed Central journal article supplement (PMC7598286; doi:10.3390/cancers12102735), 2020-09-23
Supplement: cancers-12-02735-s001.pdf [file cancers-12-02735-s001.pdf]

## Supplementary Materials

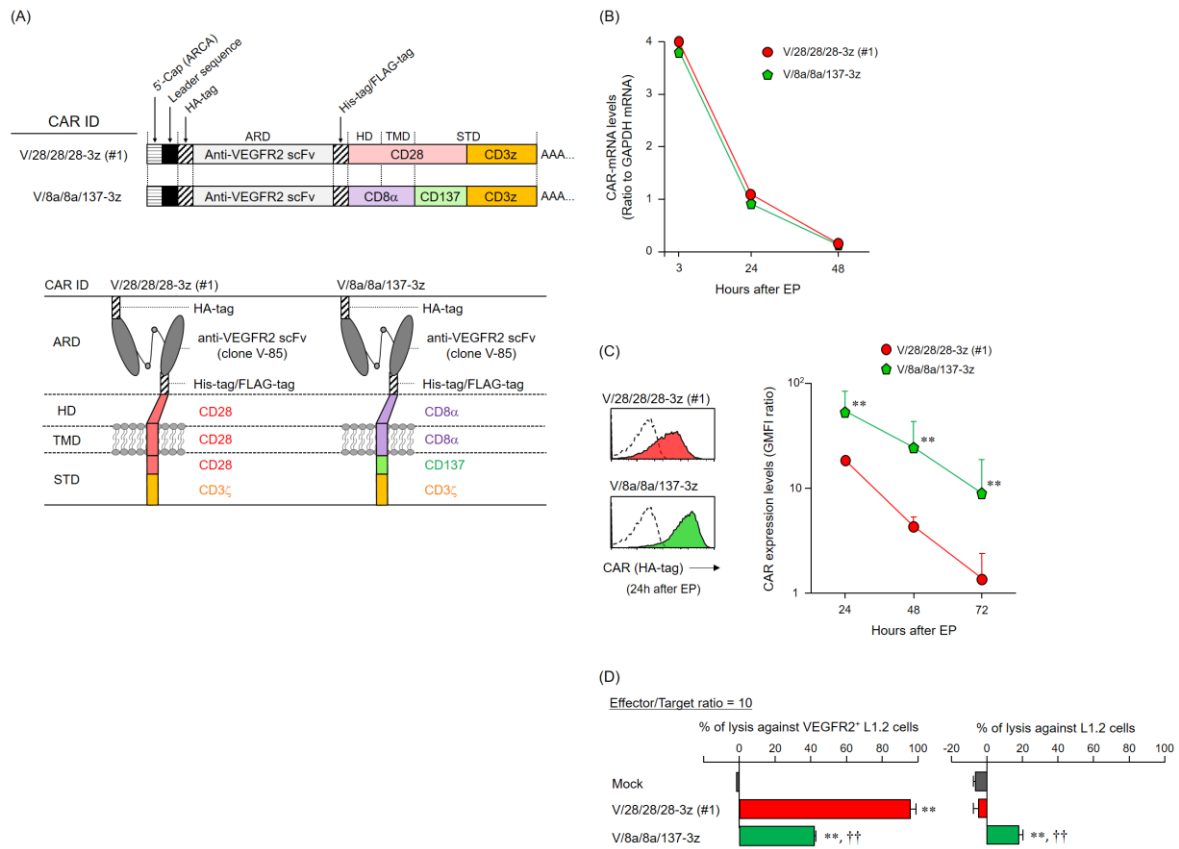

**Figure S1.** CAR expression profile and VEGFR2-specific cytotoxic activity of human T cells transfected with different CAR variants  $\alpha$  via the EP method. **(A)** Illustration of VEGFR2-specific CARs. The upper panel represents the mRNA constructs containing the VEGFR2-specific second-generation CAR genes; the lower panel represents the expected CAR proteins. **(B)** Profile of CAR-mRNAs introduced into human T cells. CAR-mRNAs introduced into human T cells were analyzed using reverse transcription-quantitative polymerase chain reaction. CAR-mRNA expression is represented, relative to that of GAPDH-mRNA. The data are shown as the mean  $\pm$  SD of triplicates and are representative of at least two independent experiments. Statistical analysis was performed using the Student's *t*-test and showed no significant differences. **(C)** Expression profiles of CAR proteins on T cell membranes. CAR expression was analyzed using flow cytometry using anti-HA-tag (solid color histograms) or isotype control antibodies (dashed white histograms). CAR expression levels are given by the ratio between anti-HA-tag mAb staining-GMFI and isotype control antibody staining-GMFI. The histograms on the left are representative results of CAR expression levels, obtained 24 h after EP. The data on the right shows the mean  $\pm$  SD of three individual experiments. Statistical analysis was performed using the Student's *t*-test: \*\*  $p < 0.01$ . **(D)** In vitro cytotoxic activity of human CAR-T cells. Human CAR-T cells cultured for 24 h after EP were co-cultured with L1.2 cells and VEGFR2<sup>+</sup> L1.2 cells at an E/T ratio of 10 for 18 h. Then, the number of L1.2 and VEGFR2<sup>+</sup> L1.2 cells in the wells was evaluated using flow cytometry. The cytotoxic activity against VEGFR2<sup>+</sup> L1.2 cells was calculated from the ratio between the number of VEGFR2<sup>+</sup> L1.2 cells in the context of CAR-T versus mock-T cells. The cytotoxic activity against L1.2 cells was also calculated from the ratio between the number of L1.2 cells in the context of CAR-T versus mock-T cells. The data are represented as the mean  $\pm$  SD of the three individual experiments using different donor-derived T cells. Statistical analysis was performed using the Tukey's test: \*\* $p < 0.01$ , CAR-T cells versus mock-T cells; †† $p < 0.01$ , CAR [V/8a/8a/137-3z]-T cells versus CAR [V/28/28/28-3z (#1)]-T cells.
